# Supplementary material for: Synergistic interactions of Cu and N on surface altered amorphous TiO2 nanoparticles for enhanced photocatalytic oxidative desulfurization of dibenzothiophene
Source: Royal Society of Chemistry journal article supplement (doi:10.1039/c6ra06684d), 2016-01-01
Supplement: c6ra06684d1.pdf [file c6ra06684d1.pdf]

### Supplementary materials

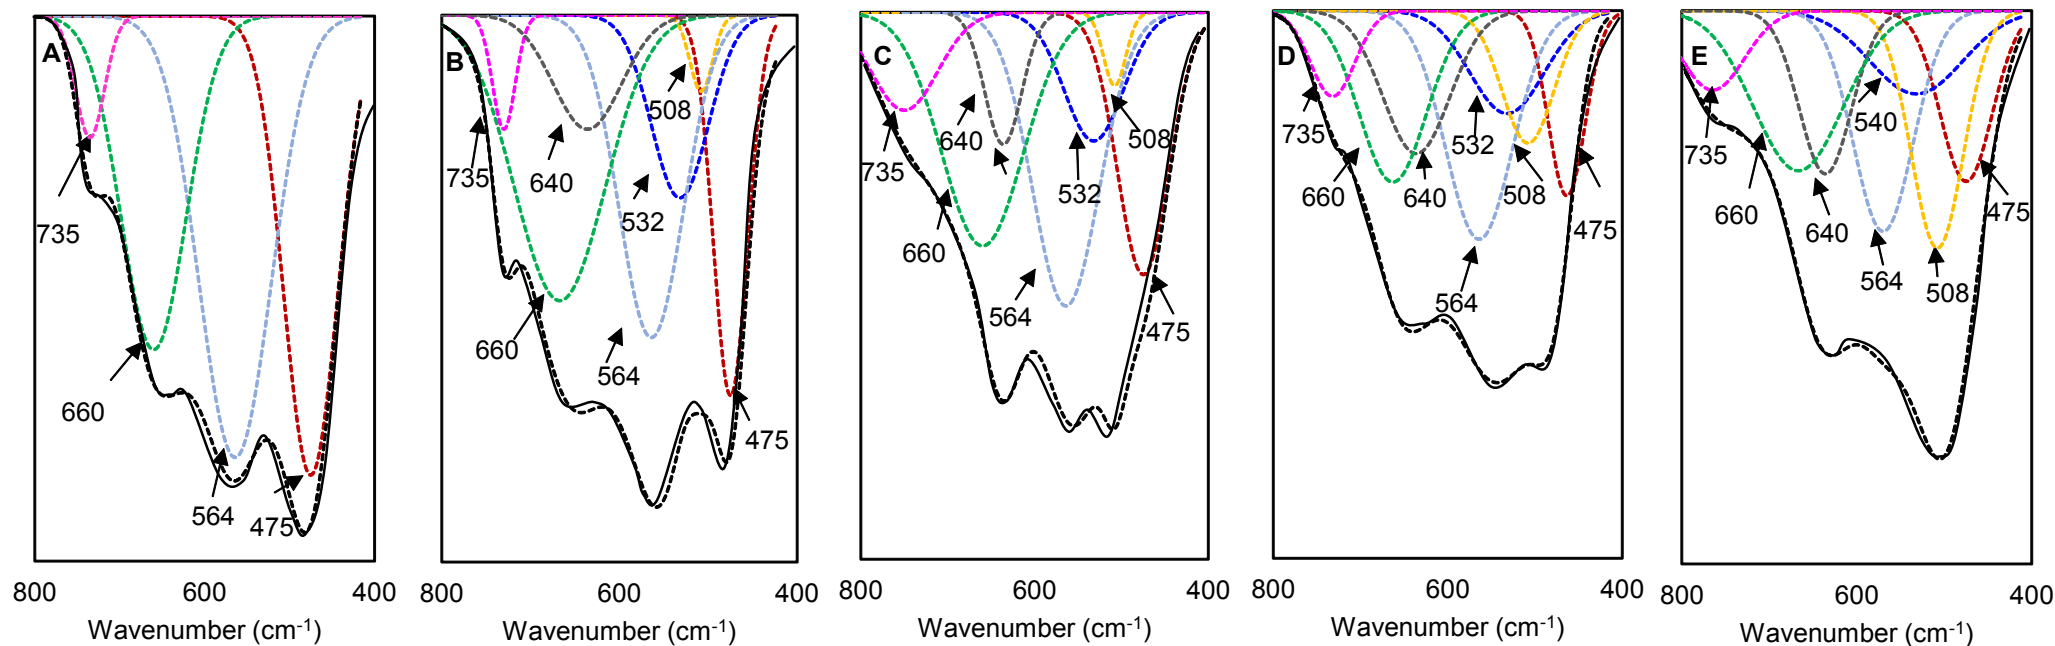

Fig S1 Gaussian curve fitting of FTIR deconvolution peak in the 800-400 cm<sup>-1</sup> region of (A) AT, (B) 5 CAT, (C) 10 CAT, (D) 15 CAT, and (E) 20 CAT.

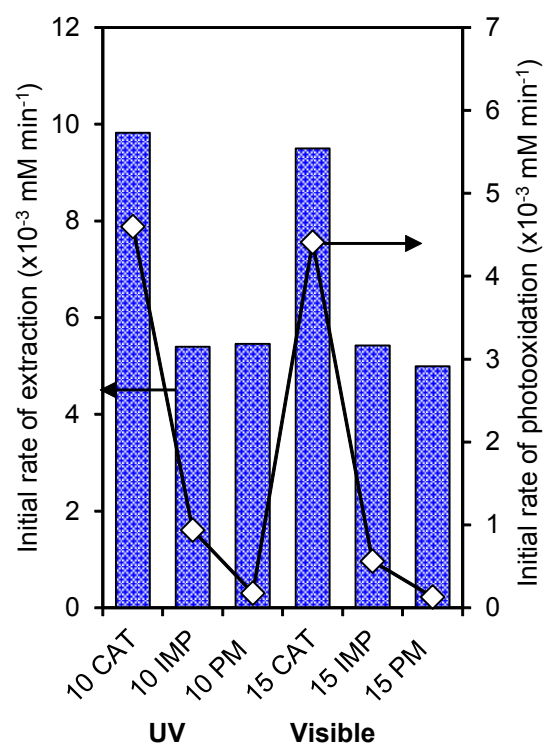

Fig. S2 Effect of different catalysts on sulfur removal under UV and visible region.
